# Supplementary material for: A Network-Based Pharmacology Study of the Herb-Induced Liver Injury Potential of Traditional Hepatoprotective Chinese Herbal Medicines
Source: PubMed Central journal article supplement (PMC6154655; doi:10.3390/molecules22040632), 2017-04-14
Supplement: molecules-22-00632-s001.pdf [file molecules-22-00632-s001.pdf]

**Supplemental Table 1.** Compounds with satisfactory pharmacokinetic properties of XCHT

| Herb           | Compound Name                                            | Molecular Weight | Oral Bioavailability (%) | Predicted Caco-2 permeability |
|----------------|----------------------------------------------------------|------------------|--------------------------|-------------------------------|
| Radix Bupleuri | $\beta$ -Thujene                                         | 136.26           | 46.44                    | 1.82                          |
| Radix Bupleuri | 19894-97-4                                               | 152.26           | 49.98                    | 1.25                          |
| Radix Bupleuri | Alloaromadendrene                                        | 204.39           | 54.04                    | 1.81                          |
| Radix Bupleuri | (L)- $\alpha$ -Terpineol                                 | 154.28           | 48.8                     | 1.39                          |
| Radix Bupleuri | 1,8-Cineole                                              | 154.28           | 39.73                    | 1.57                          |
| Radix Bupleuri | (-)-Nopinene                                             | 136.26           | 44.84                    | 1.8                           |
| Radix Bupleuri | 80-57-9                                                  | 150.24           | 50.63                    | 1.27                          |
| Radix Bupleuri | EIC                                                      | 280.5            | 41.9                     | 1.16                          |
| Radix Bupleuri | Linoleyl acetate                                         | 308.56           | 42.1                     | 1.36                          |
| Radix Bupleuri | Isoliquiritigenin                                        | 256.27           | 85.32                    | 0.44                          |
| Radix Bupleuri | ( $\pm$ )-Isoborneol                                     | 154.28           | 86.98                    | 1.27                          |
| Radix Bupleuri | D-Camphene                                               | 136.26           | 34.98                    | 1.81                          |
| Radix Bupleuri | (Z)-caryophyllene                                        | 204.39           | 30.29                    | 1.82                          |
| Radix Bupleuri | L-Bornyl acetate                                         | 196.32           | 65.52                    | 1.29                          |
| Radix Bupleuri | Pulegone                                                 | 152.26           | 51.6                     | 1.39                          |
| Radix Bupleuri | (R)-Linalool                                             | 154.28           | 39.8                     | 1.33                          |
| Radix Bupleuri | Scoparone                                                | 206.21           | 74.75                    | 0.85                          |
| Radix Bupleuri | <i>cis</i> -Carveol                                      | 152.26           | 45.61                    | 1.39                          |
| Radix Bupleuri | Cuparene                                                 | 202.37           | 38.26                    | 1.88                          |
| Radix Bupleuri | Thymol                                                   | 150.24           | 41.47                    | 1.6                           |
| Radix Bupleuri | Hexanoic acid                                            | 116.18           | 73.08                    | 0.8                           |
| Radix Bupleuri | Methyleugenol                                            | 178.25           | 73.36                    | 1.47                          |
| Radix Bupleuri | DEP                                                      | 222.26           | 52.19                    | 0.72                          |
| Radix Bupleuri | Valerophenone                                            | 162.25           | 42.58                    | 1.46                          |
| Radix Bupleuri | BdPh                                                     | 188.24           | 42.44                    | 1.32                          |
| Radix Bupleuri | (1R,4S,5R)-4-Isopropenyl-1,8-dimethylspiro[4.5]dec-8-ene | 204.39           | 40.01                    | 1.85                          |
| Radix Bupleuri | <i>p</i> -Cymen-8-ol                                     | 150.24           | 32.26                    | 1.33                          |
| Radix Bupleuri | Amyl benzene                                             | 148.27           | 34.34                    | 1.88                          |
| Radix Bupleuri | <i>cis</i> -Ligustilide                                  | 190.26           | 51.3                     | 1.3                           |
| Radix Bupleuri | Hemosol                                                  | 136.26           | 39.84                    | 1.83                          |
| Radix Bupleuri | $\delta$ -Terpineol                                      | 154.28           | 55.11                    | 1.28                          |
| Radix Bupleuri | $\beta$ -Gurjunene                                       | 204.39           | 51.36                    | 1.81                          |
| Radix Bupleuri | L-Limonene                                               | 136.26           | 38.09                    | 1.83                          |
| Radix Bupleuri | (S)-Carvone                                              | 150.24           | 47.43                    | 1.34                          |
| Radix Bupleuri | (-)-Isomenthone                                          | 154.28           | 61.19                    | 1.36                          |
| Radix Bupleuri | PTL                                                      | 86.15            | 59.53                    | 1.21                          |
| Radix Bupleuri | Borneol                                                  | 154.28           | 81.8                     | 1.22                          |
| Radix Bupleuri | (Z,Z)-Farnesol                                           | 222.41           | 41.14                    | 1.25                          |

Table S1. Cont.

|                |                                                          |        |       |      |
|----------------|----------------------------------------------------------|--------|-------|------|
| Radix Bupleuri | Eugenol                                                  | 164.22 | 56.24 | 1.35 |
| Radix Bupleuri | <i>o</i> -Thymol                                         | 150.24 | 43.28 | 1.58 |
| Radix Bupleuri | CHEBI:7                                                  | 136.26 | 45.2  | 1.84 |
| Radix Bupleuri | L-Carvone                                                | 150.24 | 49.47 | 1.35 |
| Radix Bupleuri | Apocynin                                                 | 166.19 | 31.71 | 0.74 |
| Radix Bupleuri | PCR                                                      | 108.15 | 51.99 | 1.56 |
| Radix Bupleuri | WLN: QV4                                                 | 102.15 | 70.74 | 0.78 |
| Radix Bupleuri | Guasol                                                   | 124.15 | 51.6  | 1.28 |
| Radix Bupleuri | IPH                                                      | 94.12  | 36.05 | 1.5  |
| Radix Bupleuri | Undekansaeure                                            | 186.33 | 30.14 | 0.98 |
| Radix Bupleuri | Amylol                                                   | 88.17  | 76.16 | 1.02 |
| Radix Bupleuri | Nonanoic acid                                            | 158.27 | 40.51 | 0.92 |
| Radix Bupleuri | Stigmasterol                                             | 412.77 | 43.83 | 1.44 |
| Radix Bupleuri | Nonanol                                                  | 144.29 | 33.19 | 1.17 |
| Radix Bupleuri | Acoradiene                                               | 204.39 | 36.73 | 1.85 |
| Radix Bupleuri | Nootkatone                                               | 218.37 | 33.04 | 1.36 |
| Radix Bupleuri | Methyl naphthalene                                       | 142.21 | 39.01 | 1.9  |
| Radix Bupleuri | Heptenoic acid                                           | 128.19 | 36.1  | 0.84 |
| Radix Bupleuri | (2 <i>R</i> )-2-methylcyclopentan-1-one                  | 98.16  | 60.04 | 1.21 |
| Radix Bupleuri | CHEBI:39932                                              | 128.24 | 32.79 | 1.12 |
| Radix Bupleuri | Nonenoic acid                                            | 156.25 | 65.17 | 0.95 |
| Radix Bupleuri | 2-Octenic acid                                           | 142.22 | 43.49 | 0.88 |
| Radix Bupleuri | 3,5,6,7-Tetramethoxy-2-(3,4,5-trimethoxy-phenyl)chromone | 432.46 | 31.97 | 0.75 |
| Radix Bupleuri | 3,3,5-Trimethylheptane                                   | 142.32 | 47.49 | 1.8  |
| Radix Bupleuri | ZINC01716732                                             | 158.32 | 33.08 | 1.26 |
| Radix Bupleuri | (3 <i>R</i> )-3-Methylcyclotridecan-1-one                | 210.4  | 37.65 | 1.47 |
| Radix Bupleuri | 3-Ethyl-2-methyl-1,3-hexadiene                           | 124.25 | 45.42 | 1.85 |
| Radix Bupleuri | Heptan-3-one                                             | 114.21 | 68.44 | 1.29 |
| Radix Bupleuri | (5 <i>S</i> )-5-Butyloxolan-2-one                        | 142.22 | 65.08 | 1.16 |
| Radix Bupleuri | Areapillin                                               | 360.34 | 48.96 | 0.6  |
| Radix Bupleuri | $\gamma$ -Undecalactone                                  | 184.31 | 49.12 | 1.25 |
| Radix Bupleuri | 7-Octen-4-ol                                             | 128.24 | 31.46 | 1.13 |
| Radix Bupleuri | Ayapanin                                                 | 176.18 | 41.55 | 0.97 |
| Radix Bupleuri | 8-Nonenoic acid                                          | 156.25 | 52.31 | 0.94 |
| Radix Bupleuri | Cubebin                                                  | 356.4  | 57.13 | 0.47 |
| Radix Bupleuri | Methyl hexoate                                           | 130.21 | 52.44 | 1.17 |
| Radix Bupleuri | Octalupine                                               | 264.41 | 47.82 | 0.48 |
| Radix Bupleuri | PAC                                                      | 136.16 | 72.35 | 0.84 |
| Radix Bupleuri | Sainfuran                                                | 286.3  | 79.91 | 0.9  |
| Radix Bupleuri | <i>cis</i> -2-Undecenal                                  | 168.31 | 47.07 | 1.39 |
| Radix Bupleuri | (+)-Anomalin                                             | 426.5  | 46.06 | 0.46 |

Table S1. Cont.

|                   |                                                                                 |        |        |      |
|-------------------|---------------------------------------------------------------------------------|--------|--------|------|
| Radix Bupleuri    | (5 <i>R</i> )-5-Isopropyl-2-methyl-1-cyclohex-2-enone                           | 152.26 | 35.17  | 1.35 |
| Radix Bupleuri    | Cedrenol                                                                        | 220.39 | 108.56 | 1.3  |
| Radix Bupleuri    | [(3 <i>R</i> )-3,7-dimethyloct-6-enyl] acetate                                  | 198.34 | 45.54  | 1.34 |
| Radix Bupleuri    | Cyclohexylisocyanate                                                            | 125.19 | 41.41  | 1.1  |
| Radix Bupleuri    | Ethyl geranate                                                                  | 196.32 | 64.07  | 1.41 |
| Radix Bupleuri    | Ethyl protocatechuate                                                           | 182.19 | 35.77  | 0.59 |
| Radix Bupleuri    | <i>cis</i> -Pinocampheol                                                        | 154.28 | 53.92  | 1.19 |
| Radix Bupleuri    | Isopulegol                                                                      | 154.28 | 50.72  | 1.24 |
| Radix Bupleuri    | Ledol                                                                           | 222.41 | 82.78  | 1.32 |
| Radix Bupleuri    | Limetin                                                                         | 206.21 | 36.63  | 0.88 |
| Radix Bupleuri    | Longifolene                                                                     | 204.39 | 39.49  | 1.83 |
| Rhizoma Pinelliae | Vanillic acid                                                                   | 168.16 | 35.47  | 0.43 |
| Rhizoma Pinelliae | EIC                                                                             | 280.5  | 41.9   | 1.16 |
| Rhizoma Pinelliae | Protocatechualdehyde                                                            | 138.13 | 38.35  | 0.43 |
| Rhizoma Pinelliae | Furol                                                                           | 96.09  | 34.35  | 1.08 |
| Rhizoma Pinelliae | Zoomaric acid                                                                   | 254.46 | 35.78  | 1.18 |
| Rhizoma Pinelliae | 24-Ethylcholest-4-en-3-one                                                      | 412.77 | 36.08  | 1.46 |
| Rhizoma Pinelliae | Methyl palmitelaidate                                                           | 268.49 | 34.61  | 1.4  |
| Rhizoma Pinelliae | 6-Shogaol                                                                       | 276.41 | 31     | 1.07 |
| Rhizoma Pinelliae | Cavidine                                                                        | 353.45 | 35.64  | 1.08 |
| Rhizoma Pinelliae | Baicalein                                                                       | 270.25 | 33.52  | 0.63 |
| Rhizoma Pinelliae | $\beta$ -Sitosterol                                                             | 414.79 | 36.91  | 1.32 |
| Rhizoma Pinelliae | Gynesine                                                                        | 137.15 | 60.07  | 0.58 |
| Rhizoma Pinelliae | <i>cis</i> -Ferulic acid                                                        | 194.2  | 54.97  | 0.53 |
| Rhizoma Pinelliae | <i>cis-p</i> -Coumarate                                                         | 164.17 | 45.98  | 0.46 |
| Rhizoma Pinelliae | Linolenic acid                                                                  | 278.48 | 45.01  | 1.21 |
| Rhizoma Pinelliae | Stigmasterol                                                                    | 412.77 | 43.83  | 1.44 |
| Rhizoma Pinelliae | Anethole                                                                        | 148.22 | 32.49  | 1.75 |
| Rhizoma Pinelliae | Gondoic acid                                                                    | 310.58 | 30.7   | 1.2  |
| Rhizoma Pinelliae | Coniferin                                                                       | 314.41 | 31.11  | 0.42 |
| Rhizoma Pinelliae | Eciphin                                                                         | 165.26 | 43.35  | 0.92 |
| Rhizoma Pinelliae | Oleic acid                                                                      | 282.52 | 33.13  | 1.17 |
| Rhizoma Pinelliae | l-Pseudoephedrine                                                               | 165.26 | 45.01  | 1.06 |
| Rhizoma Pinelliae | Octylene                                                                        | 112.24 | 39.25  | 1.79 |
| Rhizoma Pinelliae | 10,13-Eicosadienoic acid                                                        | 308.56 | 39.99  | 1.22 |
| Rhizoma Pinelliae | 8-Octadecenoic acid                                                             | 282.52 | 33.13  | 1.15 |
| Rhizoma Pinelliae | BVE                                                                             | 100.18 | 42.32  | 1.44 |
| Rhizoma Pinelliae | (3 <i>S</i> ,6 <i>S</i> )-3-(Benzyl)-6-(4-hydroxybenzyl)-piperazine-2,5-quinone | 310.38 | 46.89  | 0.41 |
| Rhizoma Pinelliae | Cycloartenol                                                                    | 426.8  | 38.69  | 1.53 |
| Rhizoma Pinelliae | 2 <i>Z</i> -Hexadecenoic acid                                                   | 254.46 | 34.02  | 1.22 |

Table S1. Cont.

|                    |                                                 |        |        |      |
|--------------------|-------------------------------------------------|--------|--------|------|
| Rhizoma Pinelliae  | Valeraldoxime                                   | 101.17 | 82.58  | 0.72 |
| Scutellariae Radix | 1,8-Cineole                                     | 154.28 | 39.73  | 1.57 |
| Scutellariae Radix | PEL                                             | 122.18 | 44.03  | 1.11 |
| Scutellariae Radix | Acacetin                                        | 284.28 | 34.97  | 0.67 |
| Scutellariae Radix | Wogonin                                         | 284.28 | 30.68  | 0.79 |
| Scutellariae Radix | (±)-Isoborneol                                  | 154.28 | 86.98  | 1.27 |
| Scutellariae Radix | (R)-linalool                                    | 154.28 | 39.8   | 1.33 |
| Scutellariae Radix | BOX                                             | 121.12 | 31.55  | 0.54 |
| Scutellariae Radix | (2R)-7-Hydroxy-5-methoxy-2-phenyl-chroman-4-one | 270.3  | 55.23  | 0.87 |
| Scutellariae Radix | Eugenol                                         | 164.22 | 56.24  | 1.35 |
| Scutellariae Radix | β-Patchoulene                                   | 204.39 | 50.69  | 1.79 |
| Scutellariae Radix | Baicalein                                       | 270.25 | 33.52  | 0.63 |
| Scutellariae Radix | 5,8,2'-Trihydroxy-7-methoxyflavone              | 300.28 | 37.01  | 0.76 |
| Scutellariae Radix | Dihydrobaicalin_qt                              | 272.27 | 40.04  | 0.56 |
| Scutellariae Radix | Salvigenin                                      | 328.34 | 49.07  | 0.86 |
| Scutellariae Radix | 5,2',6'-Trihydroxy-7,8-dimethoxyflavone         | 330.31 | 45.05  | 0.48 |
| Scutellariae Radix | 5-(2-Hydroxyethyl)-2-methoxyphenol              | 168.21 | 31.95  | 0.6  |
| Scutellariae Radix | Dihydrooroxylin A                               | 286.3  | 38.72  | 0.71 |
| Scutellariae Radix | Skullcapflavone II                              | 374.37 | 69.51  | 0.68 |
| Scutellariae Radix | Oroxylin A                                      | 284.28 | 41.37  | 0.76 |
| Scutellariae Radix | Tyrosol                                         | 138.18 | 33.81  | 0.65 |
| Scutellariae Radix | Panicolin                                       | 314.31 | 76.26  | 0.84 |
| Scutellariae Radix | 5,7,4'-Trihydroxy-8-methoxyflavone              | 300.28 | 36.56  | 0.46 |
| Scutellariae Radix | Neobaicalein                                    | 374.37 | 104.34 | 0.74 |
| Scutellariae Radix | Dihydrooroxylin                                 | 286.3  | 66.06  | 0.67 |
| Scutellariae Radix | β-Sitosterol                                    | 414.79 | 36.91  | 1.32 |
| Scutellariae Radix | Sitosterol                                      | 414.79 | 36.91  | 1.32 |
| Scutellariae Radix | Norwogonin                                      | 270.25 | 39.4   | 0.6  |
| Scutellariae Radix | 5,2'-Dihydroxy-6,7,8-trimethoxyflavone          | 344.34 | 31.71  | 0.93 |
| Scutellariae Radix | (-)-α-Cedrene                                   | 204.39 | 55.56  | 1.81 |
| Scutellariae Radix | (S)-Matsutake alcohol                           | 128.24 | 40.11  | 1.19 |
| Scutellariae Radix | L-Menthone                                      | 154.28 | 57.9   | 1.35 |
| Scutellariae Radix | EIC                                             | 280.5  | 41.9   | 1.16 |
| Scutellariae Radix | Stigmasterol                                    | 412.77 | 43.83  | 1.44 |
| Scutellariae Radix | DBP                                             | 278.38 | 64.54  | 0.8  |
| Scutellariae Radix | WLN: VHR                                        | 106.13 | 32.63  | 1.32 |
| Scutellariae Radix | Hyacinthin                                      | 120.16 | 38.65  | 1.31 |
| Scutellariae Radix | D-Isomenthone                                   | 154.28 | 61.2   | 1.35 |
| Scutellariae Radix | p-Coumaric acid                                 | 164.17 | 43.29  | 0.46 |
| Scutellariae Radix | Coptisine                                       | 320.34 | 30.67  | 1.21 |

Table S1. Cont.

|                     |                                                      |        |       |      |
|---------------------|------------------------------------------------------|--------|-------|------|
| Scutellariae Radix  | bis[(2S)-2-Ethylhexyl]benzene-1,2-dicarboxylate      | 390.62 | 43.59 | 0.98 |
| Scutellariae Radix  | Supraene                                             | 410.8  | 33.55 | 2.08 |
| Scutellariae Radix  | Hypnon                                               | 120.16 | 48.19 | 1.36 |
| Scutellariae Radix  | Methyl palmitelaidate                                | 268.49 | 34.61 | 1.4  |
| Scutellariae Radix  | Methyl linolelaidate                                 | 294.53 | 41.93 | 1.46 |
| Scutellariae Radix  | Pulegone                                             | 152.26 | 51.6  | 1.39 |
| Zingiber Officinale | (L)- $\alpha$ -Terpineol                             | 154.28 | 48.8  | 1.39 |
| Zingiber Officinale | ZINC02040970                                         | 222.41 | 40.43 | 1.44 |
| Zingiber Officinale | Bornyl acetate                                       | 196.32 | 65.55 | 1.3  |
| Zingiber Officinale | 1,8-Cineole                                          | 154.28 | 39.73 | 1.57 |
| Zingiber Officinale | (S)- <i>p</i> -Mentha-1,8-dien-7-al                  | 150.24 | 39    | 1.36 |
| Zingiber Officinale | Calarene                                             | 204.39 | 52.16 | 1.82 |
| Zingiber Officinale | Moslene                                              | 136.26 | 33.02 | 1.88 |
| Zingiber Officinale | Thymol                                               | 150.24 | 41.47 | 1.6  |
| Zingiber Officinale | Isoeugenol                                           | 164.22 | 70.1  | 1.38 |
| Zingiber Officinale | L-Limonene                                           | 136.26 | 38.09 | 1.83 |
| Zingiber Officinale | 6-Gingerol                                           | 294.43 | 35.64 | 0.54 |
| Zingiber Officinale | 6-Shogaol                                            | 276.41 | 31    | 1.07 |
| Zingiber Officinale | $\beta$ -Rhodinol                                    | 156.3  | 38.05 | 1.19 |
| Zingiber Officinale | $\beta$ -Citronellol                                 | 156.3  | 38.89 | 1.2  |
| Zingiber Officinale | (1S,5S)-1-isopropyl-4-methylenebicyclo-[3.1.0]hexane | 136.26 | 46.21 | 1.83 |
| Zingiber Officinale | $\beta$ -Sitosterol                                  | 414.79 | 36.91 | 1.32 |
| Zingiber Officinale | [(3S)-3,7-dimethylocta-1,6-dien-3-yl] acetate        | 196.32 | 36.84 | 1.4  |
| Zingiber Officinale | Terpinen-4-ol                                        | 154.28 | 81.41 | 1.36 |
| Zingiber Officinale | HEPTENE                                              | 98.21  | 50.67 | 1.79 |
| Zingiber Officinale | Zingiberol                                           | 222.41 | 37.24 | 1.36 |
| Zingiber Officinale | 6-Methylgingediacetate                               | 394.56 | 48.73 | 0.55 |
| Zingiber Officinale | Vanillin                                             | 152.16 | 52    | 0.68 |
| Zingiber Officinale | Alloaromadrene                                       | 204.39 | 53.46 | 1.83 |
| Zingiber Officinale | (-)-Citronellal                                      | 154.28 | 35.71 | 1.34 |
| Zingiber Officinale | D-Linalool                                           | 154.28 | 38.29 | 1.29 |
| Zingiber Officinale | ( $\pm$ )-Isoborneol                                 | 154.28 | 86.98 | 1.27 |
| Zingiber Officinale | Hemosol                                              | 136.26 | 39.84 | 1.83 |
| Zingiber Officinale | $\alpha$ -Longipinene                                | 204.39 | 53.26 | 1.83 |
| Zingiber Officinale | Vanillic acid                                        | 168.16 | 35.47 | 0.43 |
| Zingiber Officinale | (-)- $\alpha$ -Pinene                                | 136.26 | 46.25 | 1.85 |
| Zingiber Officinale | CAM                                                  | 152.26 | 67.17 | 1.29 |
| Zingiber Officinale | EIC                                                  | 280.5  | 41.9  | 1.16 |

Table S1. Cont.

|                     |                                                                                     |        |       |      |
|---------------------|-------------------------------------------------------------------------------------|--------|-------|------|
| Zingiber Officinale | Guaiol                                                                              | 222.41 | 38.77 | 1.36 |
| Zingiber Officinale | L-Bornyl acetate                                                                    | 196.32 | 65.52 | 1.29 |
| Zingiber Officinale | (R)-linalool                                                                        | 154.28 | 39.8  | 1.33 |
| Zingiber Officinale | Aromadendrene                                                                       | 204.39 | 55.74 | 1.81 |
| Zingiber Officinale | Borneol                                                                             | 154.28 | 81.8  | 1.22 |
| Zingiber Officinale | 3,4-Dimethylstyrene                                                                 | 132.22 | 32.41 | 1.9  |
| Zingiber Officinale | Eugenol                                                                             | 164.22 | 56.24 | 1.35 |
| Zingiber Officinale | (-)- $\beta$ -Phellandrene                                                          | 136.26 | 40.44 | 1.83 |
| Zingiber Officinale | <i>o</i> -Thymol                                                                    | 150.24 | 43.28 | 1.58 |
| Zingiber Officinale | $\beta$ -Cubebene                                                                   | 204.39 | 32.81 | 1.83 |
| Zingiber Officinale | L-Carvone                                                                           | 150.24 | 49.47 | 1.35 |
| Zingiber Officinale | Linolenic acid                                                                      | 278.48 | 45.01 | 1.21 |
| Zingiber Officinale | Stigmasterol                                                                        | 412.77 | 43.83 | 1.44 |
| Zingiber Officinale | (-)-Epoxy Caryophyllene                                                             | 220.39 | 35.94 | 1.57 |
| Zingiber Officinale | TMH                                                                                 | 136.26 | 46.25 | 1.82 |
| Zingiber Officinale | Neryl acetate                                                                       | 196.32 | 57.47 | 1.25 |
| Zingiber Officinale | (-)- $\alpha$ -Cedrene                                                              | 204.39 | 55.56 | 1.81 |
| Zingiber Officinale | Hexanal                                                                             | 100.18 | 55.71 | 1.25 |
| Zingiber Officinale | DBP                                                                                 | 278.38 | 64.54 | 0.8  |
| Zingiber Officinale | <i>m</i> -Cymol                                                                     | 134.24 | 48.85 | 1.88 |
| Zingiber Officinale | Nerol                                                                               | 154.28 | 35.66 | 1.15 |
| Zingiber Officinale | 2-Heptanone                                                                         | 114.21 | 46.56 | 1.31 |
| Zingiber Officinale | <i>o</i> -Cymol                                                                     | 134.24 | 51.89 | 1.88 |
| Zingiber Officinale | L-Menthone                                                                          | 154.28 | 57.9  | 1.35 |
| Zingiber Officinale | OXA                                                                                 | 46.08  | 63.21 | 0.76 |
| Zingiber Officinale | Furanodiene                                                                         | 216.35 | 45.11 | 1.77 |
| Zingiber Officinale | $\beta$ -Pinene                                                                     | 136.26 | 44.77 | 1.85 |
| Zingiber Officinale | Germacrene                                                                          | 218.37 | 32.5  | 1.33 |
| Zingiber Officinale | Terpilene                                                                           | 136.26 | 33.95 | 1.84 |
| Zingiber Officinale | (5S)-1-Isopropyl-4-methylbicyclo[3.1.0]-hex-3-ene                                   | 136.26 | 47.13 | 1.81 |
| Zingiber Officinale | Car-3-ene                                                                           | 136.26 | 45.15 | 1.85 |
| Zingiber Officinale | (R)- <i>p</i> -Menth-1-en-4-ol                                                      | 154.28 | 32.16 | 1.33 |
| Zingiber Officinale | Hepanal                                                                             | 204.39 | 53.83 | 1.86 |
| Zingiber Officinale | Calarene                                                                            | 204.39 | 51.55 | 1.82 |
| Zingiber Officinale | (1R,4S,4aR,8aR)-4-Isopropyl-1,6-dimethyl-3,4,4a,7,8,8a-hexahydro-2H-naphthalen-1-ol | 222.41 | 31.67 | 1.32 |
| Zingiber Officinale | ZINC00388662                                                                        | 196.32 | 67.05 | 1.24 |
| Zingiber Officinale | $\beta$ -Thujene                                                                    | 136.26 | 46.44 | 1.82 |
| Zingiber Officinale | L-Verbenone                                                                         | 150.24 | 50.66 | 1.26 |

Table S1. Cont.

|                     |                                                                    |        |       |      |
|---------------------|--------------------------------------------------------------------|--------|-------|------|
| Zingiber Officinale | (1S,2S)-2-Isopropenyl-4-isopropylidene-1-methyl-1-vinylcyclohexane | 204.39 | 34.47 | 1.87 |
| Zingiber Officinale | Alloaromadendrene                                                  | 204.39 | 54.04 | 1.81 |
| Zingiber Officinale | <i>cis</i> -Lanceol                                                | 220.39 | 35.94 | 1.33 |
| Zingiber Officinale | (1S,5R)-7,7-dimethyl-4-bicyclo[3.1.1]hept-3-ene carboxaldehyde     | 150.24 | 41.25 | 1.34 |
| Jujubae Fructus     | Vaccenic acid                                                      | 282.52 | 33.13 | 1.17 |
| Jujubae Fructus     | Stepharine                                                         | 297.38 | 31.55 | 0.64 |
| Jujubae Fructus     | Sylvestrene                                                        | 136.26 | 51.28 | 1.82 |
| Jujubae Fructus     | Xizyphus saponin I_qt                                              | 472.78 | 32.69 | 0.42 |
| Jujubae Fructus     | Daechualkaloid A                                                   | 139.17 | 34.94 | 0.62 |
| Jujubae Fructus     | Jujuboside A_qt                                                    | 472.78 | 36.67 | 0.54 |
| Jujubae Fructus     | Coumestrol                                                         | 268.23 | 32.49 | 0.55 |
| Jujubae Fructus     | Daechuine S7                                                       | 514.74 | 44.82 | 0.46 |
| Jujubae Fructus     | Mauritine D                                                        | 342.46 | 89.13 | 0.59 |
| Jujubae Fructus     | WLN: Q1R                                                           | 108.15 | 58.68 | 1.08 |
| Jujubae Fructus     | Berberine                                                          | 336.39 | 36.86 | 1.24 |
| Jujubae Fructus     | (S)-Coclaurine                                                     | 285.37 | 42.35 | 0.7  |
| Jujubae Fructus     | Zoomaric acid                                                      | 254.46 | 35.78 | 1.18 |
| Jujubae Fructus     | IES                                                                | 175.2  | 46.15 | 0.7  |
| Jujubae Fructus     | Mairin                                                             | 456.78 | 55.38 | 0.73 |
| Jujubae Fructus     | Stigmasterol                                                       | 412.77 | 43.83 | 1.44 |
| Jujubae Fructus     | Ziziphin_qt                                                        | 472.78 | 66.95 | 0.49 |
| Jujubae Fructus     | $\beta$ -Sitosterol                                                | 414.79 | 36.91 | 1.32 |
| Jujubae Fructus     | Stepholidine                                                       | 327.41 | 33.11 | 0.83 |
| Jujubae Fructus     | Oleic acid                                                         | 282.52 | 33.13 | 1.17 |
| Jujubae Fructus     | Nuciferin                                                          | 295.41 | 34.43 | 1.22 |
| Jujubae Fructus     | Linoleic                                                           | 280.5  | 41.9  | 1.23 |
| Jujubae Fructus     | <i>p</i> -Coumaric acid                                            | 164.17 | 43.29 | 0.46 |
| Jujubae Fructus     | Protoporphyrin                                                     | 562.72 | 30.86 | 0.67 |
| Jujubae Fructus     | Fumarine                                                           | 353.4  | 59.26 | 0.56 |
| Jujubae Fructus     | Moupinamide                                                        | 313.38 | 86.71 | 0.55 |
| Jujubae Fructus     | $\beta$ -Carotene                                                  | 536.96 | 37.18 | 2.25 |
| Licorice            | <i>o</i> -Xylene                                                   | 106.18 | 45.55 | 1.85 |
| Licorice            | <i>m</i> -Xylene                                                   | 106.18 | 47.43 | 1.83 |
| Licorice            | <i>p</i> -Xylene                                                   | 106.18 | 48.74 | 1.83 |
| Licorice            | (L)- $\alpha$ -Terpineol                                           | 154.28 | 48.8  | 1.39 |
| Licorice            | Inermine                                                           | 284.28 | 75.18 | 0.89 |
| Licorice            | $\alpha$ -Cubebol                                                  | 208.38 | 64.81 | 1.32 |
| Licorice            | ICO                                                                | 161.17 | 33.86 | 0.82 |
| Licorice            | Isoliquiritigenin                                                  | 256.27 | 85.32 | 0.44 |
| Licorice            | DFV                                                                | 256.27 | 32.76 | 0.51 |

Table S1. Cont.

|          |                                                                                                     |        |       |      |
|----------|-----------------------------------------------------------------------------------------------------|--------|-------|------|
| Licorice | Izoforon                                                                                            | 138.23 | 44.98 | 1.28 |
| Licorice | Mairin                                                                                              | 456.78 | 55.38 | 0.73 |
| Licorice | Isoheptane                                                                                          | 100.23 | 59.94 | 1.81 |
| Licorice | Heptane                                                                                             | 100.23 | 41.8  | 1.77 |
| Licorice | Glycyrol                                                                                            | 366.39 | 90.78 | 0.71 |
| Licorice | Jaranol                                                                                             | 314.31 | 50.83 | 0.61 |
| Licorice | 21987_FLUKA                                                                                         | 136.26 | 40.92 | 1.84 |
| Licorice | Medicarpin                                                                                          | 270.3  | 49.22 | 1    |
| Licorice | EB                                                                                                  | 106.18 | 49.38 | 1.83 |
| Licorice | Pinocembrin                                                                                         | 256.27 | 64.72 | 0.61 |
| Licorice | Sitosterol                                                                                          | 414.79 | 36.91 | 1.32 |
| Licorice | Lupiwighteone                                                                                       | 338.38 | 51.64 | 0.68 |
| Licorice | 7-Methoxy-2-methylisoflavone                                                                        | 266.31 | 42.56 | 1.16 |
| Licorice | Formononetin                                                                                        | 268.28 | 69.67 | 0.78 |
| Licorice | 2-Caren-10-al                                                                                       | 150.24 | 44.74 | 1.37 |
| Licorice | Calycosin                                                                                           | 284.28 | 47.75 | 0.52 |
| Licorice | $\beta$ -Terpinene                                                                                  | 136.26 | 42.29 | 1.85 |
| Licorice | Anethole                                                                                            | 148.22 | 32.49 | 1.75 |
| Licorice | (E)-1-Butoxyhex-2-ene                                                                               | 156.3  | 41.72 | 1.5  |
| Licorice | (2S)-2-[4-Hydroxy-3-(3-methylbut-2-enyl)phenyl]-8,8-dimethyl-2,3-dihydropyrano-[2,3-f]chromen-4-one | 390.51 | 31.79 | 1    |
| Licorice | Euchrenone                                                                                          | 406.56 | 30.29 | 1.09 |
| Licorice | Glyasperin B                                                                                        | 370.43 | 65.22 | 0.47 |
| Licorice | Glyasperin F                                                                                        | 354.38 | 75.84 | 0.43 |
| Licorice | Glyasperin C                                                                                        | 356.45 | 45.56 | 0.71 |
| Licorice | Isotrifoliol                                                                                        | 298.26 | 31.94 | 0.53 |
| Licorice | (E)-1-(2,4-Dihydroxyphenyl)-3-(2,2-dimethylchromen-6-yl)prop-2-en-1-one                             | 322.38 | 39.62 | 0.66 |
| Licorice | Kanzonols W                                                                                         | 336.36 | 50.48 | 0.63 |
| Licorice | Semilicoisoflavone B                                                                                | 352.36 | 48.78 | 0.45 |
| Licorice | Glepidotin A                                                                                        | 338.38 | 44.72 | 0.79 |
| Licorice | Glepidotin B                                                                                        | 340.4  | 64.46 | 0.46 |
| Licorice | Octadiene                                                                                           | 110.22 | 34.53 | 1.81 |
| Licorice | WLN: 4OVR                                                                                           | 178.25 | 48.41 | 1.31 |
| Licorice | Phaseolinisoflavan                                                                                  | 324.4  | 32.01 | 1.01 |
| Licorice | Glypallichalcone                                                                                    | 284.33 | 61.6  | 0.76 |
| Licorice | Karenzu DK2                                                                                         | 224.27 | 62.26 | 0.94 |
| Licorice | 8-(6-Hydroxy-2-benzofuranyl)-2,2-dimethyl-5-chromenol                                               | 308.35 | 58.44 | 1    |
| Licorice | (1S,2S)-1,2-Dimethylcyclopentane                                                                    | 98.21  | 41.78 | 1.78 |
| Licorice | Licochalcone B                                                                                      | 286.3  | 76.76 | 0.47 |



|          |                                                                                   |        |       |      |
|----------|-----------------------------------------------------------------------------------|--------|-------|------|
| Licorice | 2,2-Dimethylpentane                                                               | 100.23 | 55.33 | 1.79 |
| Licorice | Licochalcone G                                                                    | 354.43 | 49.25 | 0.64 |
| Licorice | 3-(2,4-Dihydroxyphenyl)-8-(1,1-dimethyl-prop-2-enyl)-7-hydroxy-5-methoxy-coumarin | 368.41 | 59.62 | 0.4  |
| Licorice | Licoricone                                                                        | 382.44 | 63.58 | 0.53 |
| Licorice | Gancaonin A                                                                       | 352.41 | 51.08 | 0.8  |
| Licorice | Gancaonin B                                                                       | 368.41 | 48.79 | 0.58 |
| Licorice | 2,3-Dimethylhexane                                                                | 114.26 | 46.24 | 1.78 |
| Licorice | 3-(3,4-Dihydroxyphenyl)-5,7-dihydroxy-8-(3-methylbut-2-enyl)chromone              | 354.38 | 66.37 | 0.52 |
